# Supplementary material
Source: HighWire-hosted journal article supplement (https://www.cmajopen.ca/highwire/filestream/80984/field_highwire_adjunct_files/1/open-2015-0006-2-at.pdf)
Supplement: open-2015-0006-2-at.pdf [file open-2015-0006-2-at.pdf]

## Appendix 2 (as supplied by the authors): Questionnaire

### RESOURCE SURVEY OF THE NETWORK OF ONTARIO PEDIATRIC DIABETES PROGRAMS

#### PART ONE: PEDIATRIC DIABETES CENTRE INFORMATION

1. Centre name \_\_\_\_\_
2. What is the furthest distance that patients travel from home to get to your centre? \_\_\_\_\_ km
3. Do you have telemedicine available at your centre?  
Yes ☐ No ☐
4. How many youth (<19 years) with diabetes are currently followed at your centre?  
Number of youth: Type 1 Diabetes \_\_\_\_\_ Type 2 Diabetes \_\_\_\_\_ Other types \_\_\_\_\_
5. When does your centre transition patients to adult care? \_\_\_\_\_
6. What is the average HbA1c of youth (<19 years) with type 1 diabetes (T1D) at your centre? \_\_\_\_\_
7. For pediatric diabetes care, how many full time equivalent (FTE) staff does your centre have for each of the following roles?

| Role                                                      | FTE | Role                     | FTE |
|-----------------------------------------------------------|-----|--------------------------|-----|
| Diabetes Nurse Educator                                   |     | Registered Social Worker |     |
| Registered Dietician                                      |     | Psychiatrist             |     |
| Psychologist                                              |     | Child life               |     |
| Administrative staff (clerk, coordinator, secretary etc.) |     | Other (please specify):  |     |

8. On average, how often do the following team members meet with youth (<19 years) with T1D at your centre each year?

| Role                                  | Visits per year | Role                     | Visits per year |
|---------------------------------------|-----------------|--------------------------|-----------------|
| Physician at your centre              |                 | Registered Dietician     |                 |
| Visiting physician (Outreach program) |                 | Registered Social Worker |                 |
| Diabetes Nurse Educator               |                 | Other (please specify):  |                 |

9. How many of each of the following types of physicians at your centre sees youth with T1D?

| Physician specialty                | Number | Role                    | Number |
|------------------------------------|--------|-------------------------|--------|
| Pediatric endocrinologist          |        | Adult endocrinologist   |        |
| Visiting pediatric endocrinologist |        | Family physician        |        |
| General pediatrician               |        | Other (please specify): |        |

10. Are there medical doctors in training (residents and/or fellows) at your centre who see youth with T1D?

Yes ☐

No ☐

PART TWO: PEDIATRIC INSULIN PUMPS AT YOUR CENTRE

11. The Ontario Ministry of Health and Long-Term Care announced funding for pediatric insulin pumps in November 2006. You may need to refer to your records to respond to questions 9a and 9b.

a. How many youth (<19 years) with T1D were followed at your centre in 2006? \_\_\_\_\_

b. Of those, how many were actively using an insulin pump? \_\_\_\_\_

12. a) Does your centre have its own eligibility criteria (in addition to the ADP criteria) for initiation or renewal?

Yes ☐

No ☐

b) If yes, please describe here, email as an attachment, or mail in pre-addressed envelope.

13. a) Does your centre have any specific ineligibility criteria (in addition to the ADP criteria)?

Yes ☐

No ☐

b) If yes, please describe here, email as an attachment, or mail in pre-addressed envelope.

14. a) Does your centre provide education for pump starts?

Yes ☐

No ☐

b) If yes, who does the teaching? (Check all that apply)

Staff physician ☐

Diabetes nurse educator from your centre ☐

Registered nurse ☐

Diabetes nurse educator provided by a pump company ☐

Registered dietician ☐

Other (please specify) \_\_\_\_\_ ☐

c) If no, where is the education provided? \_\_\_\_\_

15. Does your centre have a teaching protocol/schedule for:

a) Pump starts?

Yes ☐

No ☐

b) Ongoing pump education?

Yes ☐

No ☐

c) If yes to 15a and/or 15b, please describe here, email as an attachment, or mail in pre-addressed envelope.

16. Does your centre provide any written material for:

a) Pump starts?

Yes ☐

No ☐

b) Ongoing pump education?

Yes ☐

No ☐

c) If yes to 16a and/or 16b, please email as an attachment or mail in pre-addressed envelope.

17. a) Do you have a funded 24 hour support service for pediatric pump patients (other than what is provided by pump companies)?

Yes ☐

No ☐

b) If yes, who responds to the calls?

Physician ☐

Certified Diabetes Educator ☐

Registered nurse ☐

Other (please specify) ☐ \_\_\_\_\_

18. a) Do you have interpreter services for pump teaching and follow-up visits?

Yes ☐

No ☐

b) Are you satisfied with your interpreter services for the purpose of pump teaching and follow-up visit?

Yes ☐

No ☐

c) If no, please explain:

19. Please add any comments about the pediatric insulin pump program at your centre.

Thank you for taking the time to complete this survey.
